# Supplementary material
Source: PubMed Central journal article supplement (PMC4008798)
Supplement: mmc1.pdf [file mmc1.pdf]

# Fast Label-Free Cytoskeletal Network Imaging in Living Mammalian Cells

Pierre Bon,<sup>†\*</sup> Sandrine Lécart,<sup>§</sup> Emmanuel Fort,<sup>†</sup> and Sandrine Lévêque-Fort<sup>†§</sup>

<sup>†</sup>Institut Langevin, ESPCI ParisTech, Centre National de la Recherche Scientifique, Paris, France; <sup>‡</sup>Institut des Sciences Moléculaires d'Orsay (ISMO), Centre National de la Recherche Scientifique, Orsay, France; and <sup>§</sup>Centre de photonique Biomédicale, University Paris Sud, Orsay, France

Movie:

Living CHO cells observed during 20 minutes. (left) QPM imaging. The dynamic is fixed to visualize the entire cell compounds. (right) Numerical high-pass filtering of (left) to enhance the details in the phase image.
